# Supplementary material for: Evaluation of Microbial Dynamics of Kombucha Consortia upon Continuous Backslopping in Coffee and Orange Juice
Source: MDPI journal article supplement (doi:10.3390/foods12193545), 2023-09-24
Supplement: s1 [file s1]

Table S1 pH, TA and sensory characteristics of the initial kombucha in black tea.

| Day | pH  | TA  | Description of sensory                                      |
|-----|-----|-----|-------------------------------------------------------------|
| 0   | 4.3 | 0.0 | Taste like sweet black tea                                  |
| 1   | 4.2 | 0.4 | Dominant sweet taste, some sour notes                       |
| 2   | 4.0 | 0.4 | Slightly acetic taste                                       |
| 3   | 3.7 | 0.6 | Strongly carbonated, smells like apricot, some bitter notes |
| 4   | 3.6 | 0.7 | Strongly carbonated, good sweet-sour balance, acetic        |
| 5   | 3.5 | 1.1 | Strongly carbonated, had over-ripened food taste            |
| 6   | 3.4 | 1.8 | Strongly acetic and sour taste                              |
| 7   | 3.3 | 2.7 | Strongly carbonated, sour and acetic                        |
| 8   | 3.3 | 2.7 | Astringent and very acetic                                  |

Table S2 pH, TA and sensory characteristics of the LAB-tailored kombucha in black tea.

| Day | pH  | TA  | Description of sensory                                        |
|-----|-----|-----|---------------------------------------------------------------|
| 0   | 4.3 | 0.0 | Taste like sweet black tea                                    |
| 1   | 4.2 | 1.1 | Dominant sweet taste                                          |
| 2   | 3.8 | 1.5 | Taste like peach ice tea, sweet                               |
| 3   | 3.6 | 2.0 | Taste like peach ice tea, sweet and a bit sour                |
| 4   | 3.5 | 2.1 | Good sweet-sour balance                                       |
| 5   | 3.4 | 2.6 | Carbonated, good sweet-sour balance                           |
| 6   | 3.3 | 3.0 | Carbonated, good sweet-sour balance, no acidic taste occurred |
| 7   | 3.2 | 3.4 | Dominant sour taste, the odour was characteristic to kombucha |
| 8   | 3.1 | 4.2 | Dominant strong sour taste                                    |

Table S3 The lactic acid bacteria species abundance was measured by qPCR in LAB-tailored kombucha.

| Sampling point | Time (months) | <i>Levilactobacillus brevis</i> , cells/mL | <i>Lactiplantibacillus plantarum</i> , cells/mL | <i>Pediococcus pentosaceus</i> , cells/mL |
|----------------|---------------|--------------------------------------------|-------------------------------------------------|-------------------------------------------|
| I              | 1             | 35000                                      | 230000                                          | 200000                                    |
| II             | 2             | 2000                                       | 650                                             | 300                                       |
| III            | 2.5           | 6                                          | 1                                               | 50                                        |
| IV             | 3             | 70                                         | 80                                              | 5                                         |
| V              | 4             | 100                                        | 10                                              | 60                                        |

Table S4 pH, TA and sensory characteristics of the orange juice kombucha in the preliminary optimisation study.

| Day | pH  | TA  | Description of sensory                                                 |
|-----|-----|-----|------------------------------------------------------------------------|
| 0   | 4.2 | 5.0 | Taste like orange juice                                                |
| 1   | 4.2 | 5.6 | Taste like orange juice                                                |
| 2   | 4.1 | 6.4 | Orange juice, slightly sour and carbonated                             |
| 3   | 4.0 | 7.7 | Strongly carbonated, dominative sour taste                             |
| 4   | 3.9 | 9.1 | Strongly carbonated, chemical taste, dominative sour taste, astringent |

Table S5 Description of sensory characteristics during the orange juice kombucha backslopping (BS). The sensory was conducted by three assessors.

| Sample | Description of sensory                                                 |
|--------|------------------------------------------------------------------------|
| BS 0.1 | Taste like orange juice                                                |
| BS 0.2 | Orange juice, slightly sour and carbonated                             |
| BS 1.1 | Taste like orange juice                                                |
| BS 1.2 | Strongly carbonated, dominative sour taste                             |
| BS 2.1 | Strongly carbonated, good sweet-sour balance                           |
| BS 2.2 | Strongly carbonated, chemical taste, dominative sour taste             |
| BS 3.1 | Strongly carbonated, good sweet-sour balance                           |
| BS 3.2 | Strongly carbonated, chemical taste, dominative sour taste, astringent |
| BS 4.1 | Strongly carbonated, dominative sour taste                             |
| BS 4.2 | Strongly carbonated, chemical taste, strong sour, and astringent taste |
| BS 5.1 | Strongly carbonated, dominative sour taste                             |
| BS 5.2 | Strongly carbonated, chemical taste, strong sour, and astringent taste |

Table S6 pH, TA and sensory characteristics of the coffee kombucha in the preliminary optimisation study

| Day | pH  | TA  | Description of sensory                                          |
|-----|-----|-----|-----------------------------------------------------------------|
| 0   | -   | -   | Characteristic taste and odour of coffee                        |
| 1   | 4.6 | 0.9 | Characteristic taste and odour of coffee                        |
| 2   | 4.5 | 1.1 | Dominative taste of sweet coffee, more sweet than sour taste    |
| 3   | 4.4 | 1.9 | Dominative taste of sweet coffee, balanced sweet and sour taste |
| 4   | 4.2 | 2.4 | Balanced sweet and sour taste, some notes of acetic acid        |

|   |     |     |                                  |
|---|-----|-----|----------------------------------|
| 5 | 4.2 | 3.2 | Dominative sour and bitter taste |
|---|-----|-----|----------------------------------|

Table S7 Description of sensory characteristics during the coffee kombucha backslopping. The sensory was conducted by three assessors.

| Sample | Description of sensory                                                               |
|--------|--------------------------------------------------------------------------------------|
| BS 0.1 | Characteristic taste and odour of coffee                                             |
| BS 0.2 | Dominative taste of sweet coffee, balanced sweet and sour taste                      |
| BS 0.3 | Dominative taste of sweet coffee, balanced sweet and sour taste                      |
| BS 0.4 | Balanced sweet and sour taste, bitterness of coffee was stronger than a day before   |
| BS 1.1 | Characteristic taste and odour of coffee                                             |
| BS 1.2 | Dominative taste of sweet coffee, balanced sweet and sour taste                      |
| BS 1.3 | Balanced sweet and sour taste, some notes of acetic acid                             |
| BS 1.4 | Dominative sour and bitter taste                                                     |
| BS 2.1 | Characteristic taste and odour of coffee                                             |
| BS 2.2 | Dominative taste of sweet coffee, balanced sweet and sour taste, slightly carbonated |
| BS 2.3 | Dominative sour and bitter taste                                                     |
| BS 2.4 | Dominative sour and acetic taste                                                     |
| BS 3.1 | Characteristic taste and odour of coffee                                             |
| BS 3.2 | Dominative taste of sweet coffee, balanced sweet and sour taste, slightly carbonated |
| BS 3.3 | Dominative taste of sweet coffee, balanced sweet and sour taste, slightly carbonated |
| BS 3.4 | Dominative sour and very bitter taste, carbonated                                    |
| BS 4.1 | Characteristic taste and odour of coffee                                             |
| BS 4.2 | Dominative taste of sweet coffee, balanced sweet and sour taste, slightly carbonated |
| BS 4.3 | Dominative sour taste, carbonated                                                    |
| BS 4.4 | Intensively sour and bitter taste, carbonated                                        |
| BS 5.1 | Characteristic taste and odour of coffee                                             |
| BS 5.2 | Dominative taste of sweet coffee, balanced sweet and sour taste, slightly carbonated |
| BS 5.3 | Dominative sour and bitter taste, carbonated                                         |
| BS 5.4 | Intensively sour and bitter taste, carbonated                                        |

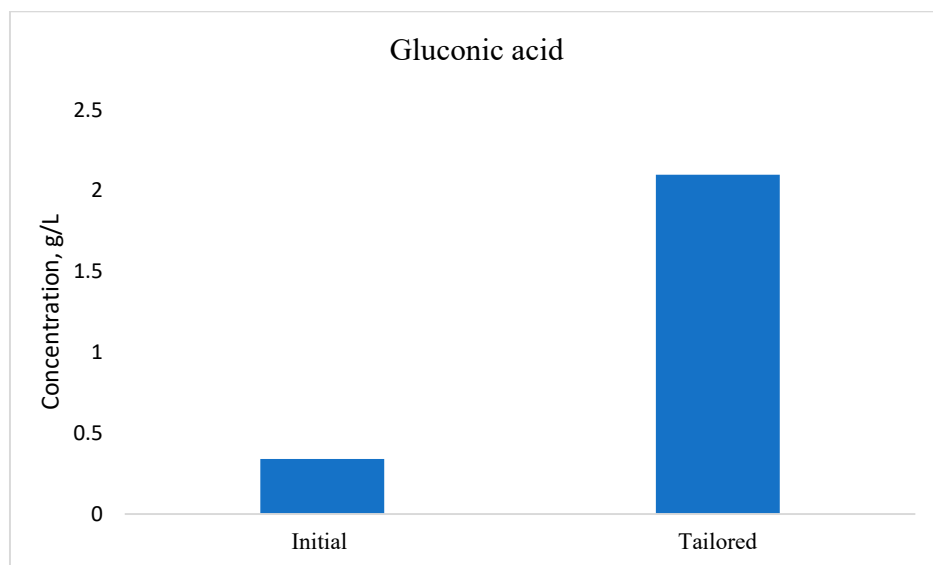

Figure S1 Gluconic acid concentrations in initial and LAB-tailored kombucha.
